# Supplementary material
Source: PubMed Central journal article supplement (PMC6839822)
Supplement: f-75-00697-sup1.pdf [file f-75-00697-sup1.pdf]

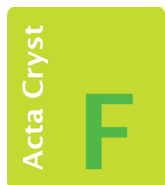

STRUCTURAL BIOLOGY  
COMMUNICATIONS

**Volume 75 (2019)**

**Supporting information for article:**

**Structural analysis of free and liganded forms of the Fab fragment of a high-affinity anti-cocaine antibody, h2E2**

**Kemin Tan, Min Zhou, Angela J. Ahrendt, Norma E. C. Duke, Nassif Tabaja, William J. Ball, Terence L. Kirley, Andrew B. Norman, Andrzej Joachimiak, Marianne Schiffer, Rosemarie Wilton and P. Raj Pokkuluri**

## S1. Materials and Methods

Primers used for amplification of the pASK88 expression vector and h2E2 Fab domain sequences for seamless cloning are listed in Table S1. Primers used for sequence analysis of the Fab region of the expression vector are given in Table S2. Table S3 contains sequences of the synthetic DNA used to construct the h2E2 Fab. The full sequence of the pASK88\_h2E2\_Fab expression vector is provided in Table S4.

**Table S1** Primers used for vector construction

| Primer                  | Sequence (5'-3')                                |                                                              |
|-------------------------|-------------------------------------------------|--------------------------------------------------------------|
| <b>pASK88_FW</b>        | TAATAAGCTTGACCTGTGAAGTG                         | For amplification of vector for insertion of Lambda2C gBlock |
| <b>pASK88_RV</b>        | TTTGATCTCGAGCTTGGTCCC                           | Rev amplification of vector for insertion of Lambda2C gBlock |
| <b>88CenterF</b>        | CCTCCACCAAGGGCCCATCGG                           | For amplification of vector for insertion of VH domain       |
| <b>88Omp-R</b>          | GGCCTGCGCTACGGTAGCG                             | Rev amplification of vector for insertion of VH domain       |
| <b>882E2VHF</b>         | TACCGTAGCGCAGGCCGAAGTGCAGTTGGTT<br>GAATCAGGTGG  | For amplification of VH domain from synthetic DNA            |
| <b>882E2VHR</b>         | GGCCCTTGGTGGAGGCGCTACTCACCGTCAC<br>TAATGTCCC    | Rev amplification of VH domain from synthetic DNA            |
| <b>88CenterR</b>        | GGCTTTTGTTCACAGGGGTAAACAGTAACGG                 | For amplification of vector for insertion of VL domain       |
| <b>88LamF</b>           | GGCCAGCCGAAAGCCGCC                              | Rev amplification of vector for insertion of VL domain       |
| <b>882E2VLF</b>         | CCCTGTGACAAAAGCCCAGGCAGTAGTTATT<br>CAGGAAAGCGC  | For amplification of VL domain from synthetic DNA            |
| <b>88Lam2E2V<br/>LR</b> | CGGCTTTCGGCTGGCCCAATACTGTAACCTT<br>CGTGCCACCTCC | Rev amplification of VL domain from synthetic DNA            |

**Table S2** Primers used for sequencing

| Primer    | Sequence (5'-3')        |                                                                     |
|-----------|-------------------------|---------------------------------------------------------------------|
| pASK88P1F | CGAATGGCCAGATGATTAATTCC | Hybridizes in promoter region to read through heavy chain (For)     |
| pASK88P2R | ACAGTAACGGTAAGAGTGCCA   | Hybridizes in PhoA leader peptide to read through heavy chain (Rev) |
| pASK88P3F | GGCACCCAGACCTACATCT     | Hybridizes in heavy chain C1 to read through light chain (For)      |
| pASK88P4R | CTTAATGCGCCGCTACAGG     | Hybridizes in fl ori to read through light chain (Rev)              |

**Table S3** Sequences of synthesized DNA fragments used in this study. The lambda2C gBlock has overlaps for seamless cloning (lower case). The h2E2 VH and VL domains (upper case) were synthesized as an scFv with NcoI and NotI sites (underlined) for cloning into pET22B (R. Wilton, unpublished work). Synthetic DNA sequences were expression optimized for *E. coli*.

| Fragment                                      | Sequence (5'-3')                                                                                                                                                                                                                                                                                                                                                                                                                                                                                                                                                                                                                                                                                                                                                                |
|-----------------------------------------------|---------------------------------------------------------------------------------------------------------------------------------------------------------------------------------------------------------------------------------------------------------------------------------------------------------------------------------------------------------------------------------------------------------------------------------------------------------------------------------------------------------------------------------------------------------------------------------------------------------------------------------------------------------------------------------------------------------------------------------------------------------------------------------|
| huLambd2C gBlock                              | caagctcgagatcaaaGGCCAGCCGAAAGCCGCCCCCTCCGTCACCCTGTTCCCTCCCTCCTCTGAAGAACTGCAGGCTAACAAAGCGACCCTGGTTTG<br>TTTAATTTCTGACTTCTACCTCGTGCCTGACCGTAGCATGAAAAGCCGATTTCATCCCCGTAAAAGCCGGAGTGAGACCACGACCCCTCAAAAACA<br>GTCCAATAACAAATATGCCGCCTTCTCTATCTCAGCCTTACCCCGAACAAATGAAATCACACCGTTCTTATTCCTGCCAAGTCACCCACGAAGTTTC<br>CACCGTTGAAAAAACCGTAGCCCAACCGAATGCTCCTaataagcttgacctg                                                                                                                                                                                                                                                                                                                                                                                                            |
| h2E2 VH and VL domains (formatted as an scFv) | ccatggctGAAGTGCAGTTGGTTGAATCAGGTGGGGTTTAGTACAGCCGGTGGTAGTTTACGTTTGTTCATGTGCGGCATCAGGTTTTATTTTTAGTA<br>GTGATTGGATGAATTGGGTACGTCAAGCACCGGGAAAAGGATTAGAATGGGTGGCGAATATTAATCAAGATGGTTCAGAAAAATATTATGTGGATTCAG<br>TTAAAGGTCGTTTTACAATCAGCCGTGACAACGCACAAAATAGCTTATACTTACAAATGAACAGTTTACGGGCAGAGACACAGCAGTATATTATGTG<br>CAAAGGAATTAGGGCCGTGGGGCAAGGGACATTAGTGACGGTGAGTAGCgggggagggggcagcggcggtggtggttcgggagggggaggttcgacac<br>AGGCAGTAGTTATTCAGGAAAGCGCACTCACGACATCTCCGGGGGACGGTTATCTCACTTGCCGCAGCAGTACAGGAACGATTACGACTTCTAACT<br>ATGCAAAATGGGTCCAGAAAAACCGAATCATGTGTTTACGGGTTTAAATGGGGCAACGAGCATTGCGCGCCGGGAGTCCGGTACGTTTTAGCGGGT<br>TTCTTATGGTGGAAAGGCAGCATTAACTATTACAGGAGCGCAAACCGAAGATGATGCTATGTATTTTTGCGCGTTATGGTATAACACACACTATGTTT<br>TTGGAGGTGGCACGAAGTTACAGTATTGGGGCAAgcgccgc |

**Table S4** Full sequence of the h2E2 rFab expression vector

| Plasmid          | Sequence (5'-3')                                                                                                                                                                                                                                                                                                                                                                                                          |
|------------------|---------------------------------------------------------------------------------------------------------------------------------------------------------------------------------------------------------------------------------------------------------------------------------------------------------------------------------------------------------------------------------------------------------------------------|
| pASK88_h2 E2_Fab | ACCCGACACCATCGAATGGCCAGATGATTAATTCCTAATTTTTGTTGACACTCTATCATTGATAGAGTTATTTTACCACT<br>CCCTATCAGTGTAGAGAAAAGTGAATGAAATAGTTCGACAAAATCTAGATAACGAGGGCAAAAATGAAAAGACAGC<br>TATCGCGATTGCAGTGGCACTGGCTGGTTTcgctACCGTAGCGCAGGCCGAAGTGCAGTTGGTTGAATCAGGTGGGGTT<br>TAGTACAGCCGGTGGTAGTTTACGTTTGTATGTGCGGCATCAGGTTTTATTTTTAGTAGTGATTGGATGAATTGGGTA<br>CGTCAAGCACCGGAAAAGGATTAGAATGGGTGGCGAATATTAATCAAGATGGTTCAGAAAAATATTATGTGGATTTCAGT |

TAAAGGTCGTTTTACAATCAGCCGTGACAACGCACAAAATAGCTTATACTTACAAAATGAACAGTTTACGGGCAGAAGACA  
CAGCAGTATATATTGTGCAAAGGAATTAGGGCCGTGGGGCAAGGGACATTAGTGACGGTGAGTAGCGCCTCCACCAAG  
GGCCATCGGTCCTCCCTTGGCACCTCCTCCAAGAGCACCTCTGGGGCACAGCGCCCTGGGCTGCCTGGTCAAGGA  
CTACTTCCCCGAACCGGTGACGGTGTCTGGAACTCAGGCGCCCTGACCAGCGCGTGCACACCTTCCCGGCTGCCTAC  
AGTCTCAGGACTCTACTCCCTCAGCAGCGTGGTACTGTGCCCTCCAGCAGCTTGGGCACCCAGACCTACATCTGCAAC  
GTTAATCACAACCCAGCAACACCAAGGTGACAAGAAAGTTGAGCCAAAATCTTGCCATCACCACCATCACCATTAATA  
ACCATGGAGAAAAATAAGTGAACAAAGCACTATTGCACTGGCACTTCTTACCGTTACTGTTTACCCTGTGACAAAAGCC  
caggcagtagttattcaggaagcgcACTCACGACATCTCCGGGGGGACGGTTATTCTCACTTGCAGCAGTACAGG  
AACGATTACGACTTCTAATATGCAAATGGGTCCAGAAAAACCGAATCATGTGTTTACGGGTTAATTGGGGCAACGA  
GCATTCGCGCGCCGGGAGTGCCGGTACGTTTTAGCGGGTTTTCTTATTTGGTGAAAGGAGCAGCATTAACTATTACAGGAGCG  
CAAACCGAAGATGATGCTATGATTTTTGCGCGTTATGGTATAACACACTATGTTTTTGGAGGTGGCACGAAGGTTAC  
AGTATTGGGCCAGCCGAAAGCCGCCCTCCGTCAACCTGTTCCCTCCCTCCTCTGAAGAACTGCAGGCTAACAAAGCGA  
CCCTGGTTTTGTTAATTTCTGACTTCTACCTTGGTGCCGTACCGTAGCATGGAAAGCCGATTTCATCCCCGTAAAAGCC  
GGAGTGGAGACCAGCCCTCAAAACAGTCCAATAACAAATATGCCGCTTCTCTATCTCAGCCTTACCCCCGAACA  
ATGAAATCACACCGTCTTATTCTGCAAGTCAACACGAAGTTCACCGTTGAAAAACCGTAGCCCCAACCGAAT  
GCTCTAATAAGCTTGACCTGTGAAGTGAATAAGGCGCACATTTGTGCGACATTTTTTTTGTCTGCCGTTTACCGCTACT  
GCGTCACGGATCTCCACGCGCCCTGTAGCGCGCATTAAGCGCGGGGTGGTGGTTACGCGCAGCGTGACCGCTACA  
CTTGGCAGCGCCCTAGCGCCGCTCCTTCGCTTTCTTCCCTCCTTCTCGCCAGCTTCCGCGGCTTCCCGCTCAGC  
TCTAAATCGGGGCTCCTTTAGGGTCCGATTTAGTGCTTTACGGCACCTCGACCCAAAAAACTTGATTAGGGTGATG  
GTTACGTAAGTGGCCATCGCCCTGATAGACGGTTTTTCGCCCTTGGAGTCCACGTTCTTAAATAGTGACTC  
TTGTTCAAACTGGAACAACACTCAACCTATCTCGGTCTATTTTGTATTTATAAGGGATTTTGGCGATTTCCGCCA  
TTGGTTAAAAAATGAGCTGATTTAACAAAAATTTAACGCGAATTTTAAACAAAATATAACGTTTACAATTTCAAGTGGCA  
CTTTTCGGGAAATGTGCGCGAAACCCCTATTTGTTTATTTTCTAAATACATTCAAATATGTATCCGCTCATGAGACAA  
TAACCTGATAAATGCTTCAATAATATTGAAAAAGGAAGATGAGTATTCAACATTTCCGTGTGCCCTTATCCCTT  
TTTTGCGGCATTTGCCTTCTGTTTTTGTCTCACCAGAAACGCTGGTGAAGTAAAAGATGCTGAAGATCAGTTGGGTG  
CACGAGTGGGTTACATCGAACTGGATCTCAACAGCGGTAAGATCCTTGAGAGTTTTCGCCCCGAAGAAGCTTTTCCAATG  
ATGAGCACTTTTAAAGTTCTGCTATGTGGCGCGTATTTATCCCGTATGACGCGGGCAAGCAACTCGGTCGCGCAT  
ACACTATTCTCAGAATGACTTGGTTGAGTACTCACAGTCACAGAAAAGCATCTTACGGATGGCATGACAGTAAGAGAAT  
TATGAGTGTGCCATAACCATGAGTGATAACACTGCGGCCAACTTACTTCTGACAACGATCGGAGGACCGAAGGAGCTA  
ACCGTTTTTTGACACAACATGGGGGATCATGTAACCTGCTTATGCTTGGGAACCGGAGCTGAATGAAGCCATACAAA  
CGACGAGCGTGACACCAGATGCCTGTAGCAATGGCAACAACGTTGCGCAAACATTTAACTGGCGAACTACTTACTCTAG  
CTTCCCGGCAACAATTTGATAGACTGGATGGAGCGGATAAAGTTGCAGGACCACTTCTGCGCTCGGCCCTTCCGGCTGGC  
TGGTTTTATTGCTGATAAATCTGGAGCCGGTGAGCGTGGCTCTCGCGTATCATTGACGACCTGGGCGCAGATGGTAAGCC  
CTCCCGTATCGTAGTTATCTACAGCAGGGGAGTCAAGCAACTATGGATGAACGAAATAGACAGATCGCTGAGATAGGTG  
CCTCACTGATTAAGCATTGGTAGGAATTAATGATGTCTCGTTTAGATAAAAGTAAAGTGAATTAACAGCGCATTAGAGCTG  
CTTAATGAGGTCGAAATCGAAGGTTTAAACACCCGTAACCTCGCCAGAAGCTAGGTGTAGAGCAGCCTACATTTGATTTG  
GCATGTAATAAAGCGGCTTTGCTCGACGCCCTTAGCCATTGAGATGTTAGATAGGCACCATACTCACTTTTGCCTT  
TAGAAGGGGAAAGCTGGCAAGATTTTTTACGTAATAACGCTAAAAGTTTTAGATGTGCTTTACTAAGTCATCGCGATGGA  
GCAAAAGTACATTTAGGTACACGGCTACAGAAAAACAGTATGAAACTCTCGAAAATCAATTAGCCTTTTTATGCCAACA  
AGGTTTTTCACTAGAGAATGCATTATATGCACTCAGCGCAGTGGGGCATTTTACTTTAGGTTGCGTATTGGAAGATCAAG  
AGCATCAAGTCGCTAAAGAAGAAAGGGAAACACCTACTACTGATAGTATGCCGCCATTTATACGACAAGCTATCGAATTA  
TTTGATCACCAGGTGAGAGCCAGCCTTCTTATTCCGGCTTGAATTTGATCATATGCCGATTAGAAAAACAACCTTAAATG  
TGAAAGTGGGCTTAAAGCAGCATAACCTTTTTCCGTGATGGTAACTTCACTAGTTTAAAGGATCTAGGTGAAGATCC  
TTTTTGATAATCTCATGACAAAATCCCTTAAACGTGAGTTTTCTGTTCCACTGAGCGTCAACCCCGTAGAAAAGATCAAA  
GGATCTTCTGAGATCCTTTTTTCTGCGGTAATCTGCTGCTTGCAAAACAAAAAACACCGCTACCAGCGTGGTTTTG  
TTGCGGATCAAGAGCTACCAACTCTTTTTCCGAAGGTAACCTGGCTTACAGAGCGCAGATACCAAACTACTGCTCTC  
TAGTGTAGCCGTAGTTAGGCCACCACTTCAAGAACTCTGTAGCACCGCTACATACCTCGCTCTGCTAATCTGTTACCA  
GTGGCTGCTGCCAGTGGCGATAAGTCTGTCTTACCAGGTTGGACTCAAGACGATAGTTACCGGATAAGGCGCAGCGGTC  
GGGCTGAACGGGGGTTCTGTGCACACAGCCAGCTTGGAGCGAACGACCTACACCGAACTGAGATACCTACAGCGTGAGC  
TATGAGAAAGCGCCAGCTTCCGAAGGGAGAAAGCGGACAGGTATCCGGTAAGCGGCGAGGTCGGAACAGGAGAGCGC  
ACGAGGGAGCTTCCAGGGGAAACGCTGGTATCTTTATAGTCTGTGCGGTTTTGCCACCTCTGACTTGAGCGTCAAT  
TTTTGTGATGCTGTGAGGGGGCGGAGCCTATGGA AAAACGCGACACGCGCCTTTTTACGGTTCTGGCCTTTTTGCT  
GGCCTTTTGTCTACATG

**Table S5** Elbow angles observed in crystals of Fab-BE complex and unliganded Fab.

| rFab complex crystals       |                 |
|-----------------------------|-----------------|
| Fab (light, heavy chain id) | Elbow angle (°) |
| Fab-1 (L, H)                | 151.8           |
| Fab-2 (A, B)                | 151.9           |
| Fab-3 (C,D)                 | 155.8           |
| Fab-4 (E,F)                 | 165.6           |
| Fab-5 (I, J)                | 173.1           |
| Fab-6 (M, N)                | 166.1           |
| Fab-7 (O, P)                | 171.6           |
| Fab-8 (J, K)                | 163.4           |
| Free mFab crystals          |                 |
| Fab (light, heavy chain id) | Elbow angle (°) |
| Fab-1 (L, H)                | 145.1           |
| Fab-2 (A, B)                | 137.1           |

**Table S6** The ligand binding site is occluded for one of the two Fab molecules found in the asymmetric unit of the apo Fab crystals. This table lists the hydrogen bonds observed between one of the Fab molecules in the asymmetric unit (chain A, light chain) and atoms from a crystallographic contact (chain B, heavy chain). In addition to the hydrogen bonds, aromatic – pi interaction was observed between Trp93A and Lys129B of the crystallographic contact.

| Fab atoms from the asymmetric unit | Atoms from crystal contact | Distance (Å) |
|------------------------------------|----------------------------|--------------|
| Tyr34A OH                          | Ser130B N                  | 2.6          |
| Trp93A NE1                         | Ser130B O                  | 3.1          |

**Figure S1** Benzoylecgonine (BE)-KLH antigen used to generate the anti-cocaine h2E2 mAb.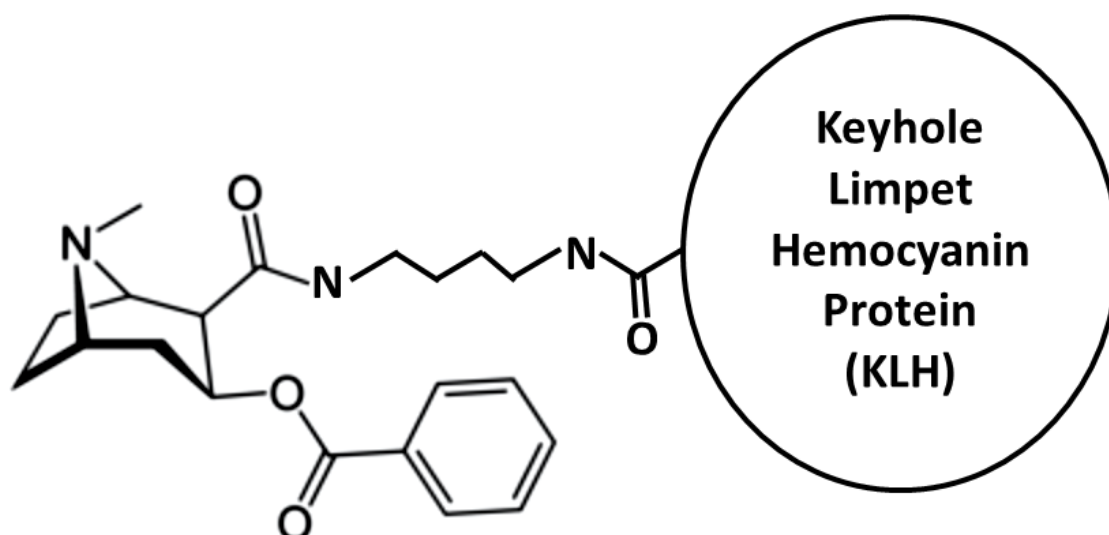

## S2. CHO-cell production of the recombinant mAb h2E2

The hybridoma cell line secreting the original anti-cocaine mAb designated 2E2 that was composed of a human  $\gamma 1$  heavy chain and a murine  $\lambda$  light chain was generated, identified and isolated using standard hybridoma technology. This was accomplished as previously described by fusing splenocytes obtained from a transgenic mouse strain, designated HCo7/Ko5 that had been immunized with a hapten-carrier conjugate with cells of the murine myeloma cell line P3X63-Ag8.653 (Paula *et al.*, 2004; Fishwild *et al.*, 1996). Further, the re-engineering and replacement of the murine  $\lambda c$  light chain constant region with the human  $\lambda c$  domain and use of Catalent Pharma (Madison, WI) GPEX® technology to generate stably transfected CHO-S cells that produce high levels of the recombinant, further “humanized” h2E2 mAb as well as its purification has been previously described (Norman *et al.*, 2014).

### S3. Preparation and characterization of Fab from mAB h2E2 and reductive methylation of Fab fragment

The h2E2 anti-cocaine mAb Fab fragment was generated by Endo-Lys-C digestion, followed by purification, as described previously (Kirley & Norman 2015). The Fab fragment was reductively methylated on lysine residues as a way to aid crystallization, basically as described previously (Walter *et al.*, 2006; Tan *et al.*, 2014). Typically, 10 mg of purified Fab was cooled to 4°C in 10 ml of 50 mM HEPES, 250 mM NaCl, pH=7.5. To that sample, 0.2 ml of 1.0M Borane-Dimethyl complex (“ABC” complex, in water) and 0.4 ml of 1.0M formaldehyde (in water) were added, the solution gently mixed, and incubated for 2 hours at 4°C. Then, an additional 0.2 ml of 1.0M Borane-Dimethyl complex (“ABC”) in water and 0.4 ml of 1.0M formaldehyde in water were added, the solution gently mixed, and the incubation continued at 4°C for 2 more hours. Finally, an additional 0.1 ml 1.0M Borane-Dimethyl complex (“ABC”) was added, the solution gently mixed, and the reaction allowed to continue overnight at 4°C (an additional 18 hours). The approximately 10 ml reaction mixture was concentrated to approximately 2 ml using an Amicon Ultra 15ml 30 kDa MWCO spin concentrator, and immediately loaded onto a 43 ml, (28 cm long) Sephacryl S-100 size exclusion chromatography column equilibrated in 20 mM Tris-Cl, 100 mM NaCl, pH=7.2. The column was run at ambient temperature at 0.5 ml/min and fractions collected every 2 minutes. Fractions were examined for Abs<sub>280nm</sub>, and the peak fractions (25-30) were pooled and concentrated to less than 1 ml using an Amicon Ultra 15ml 30 kDa MWCO spin concentrator. The concentrated methyl-Fab preparation was quantified by dilution and measurement of A<sub>280nm</sub>, using the extinction coefficient for the purified Fab of 73,965 M<sup>-1</sup>cm<sup>-1</sup> (calculated from the amino acid sequence, and equivalent to OD 280nm = 1.612 for a 1.0 mg/ml solution of Fab).

Fab and methylated Fab samples were buffer exchanged into 0.1% formic acid immediately before submission for mass spectral analyses, which were done in the laboratory of Dr. Ken Greis at the University of Cincinnati, College of Medicine, on a fee for service basis. Flow infusion electrospray ionization time-of-flight (ESI-TOF) mass spectrometry was employed to determine protein masses. Briefly, each sample, at approximately 2-4 mg/ml, was diluted 1:1 in 60% acetonitrile/0.1% formic acid to a final concentration of 30% ACN/0.1% formic acid. The sample was infused into the mass spectral ABSciex 5600 plus system at 500nL/min and the positive ion ToF-MS spectra were collected. The data were further processed using the protein reconstruct algorithm in the PeakView ver 2.1 software from ABSciex to generate the reconstructed mass profile. Apomyoglobin (mass = 16951.3) was also infused at 2.5 pmole/uL in the same solvent to validate the process and validate the reconstructed mass.

Both Fab and methylated Fab (mFab) were examined by ESI-TOF mass spectral analysis. Based on the amino acid sequence, the presence of 5 disulfide bonds per Fab fragment, and a glutamine to pyroglutamate post-translational modification of the N-terminus of the Fab light chain, the theoretical calculated average mass of the underivatized h2E2 Fab fragment is 45865.5 Da. Four independent Fab preps yielded experimental masses of 45867.8, 45867.2, 45866.9, and 45468.8 Da (average = 45867.7 ± 0.9 Da), possibly suggesting two amidations on the Fab fragment (delta mass per amidation = 1.0 Da). Three preparations of methyl-Fab were produced for mass

spectral analyses and crystallization trials, and the purified yield of the methyl-Fab was  $81\% \pm 7\%$  of the starting Fab. To determine the number of methyl groups added by the methylation reactions, paired starting Fab fragments and methylated Fab fragments were analyzed. For three methyl-Fab preparations, the delta mass observed between the methyl-Fab and the Fab fragment were +686, +689, and +689 Da. Since each methyl group adds +14 Da, this corresponds to 49.0, 49.2, and 49.2 methyl groups added per Fab. The maximum number of methyl groups that theoretically could be introduced by methylation of the Fab fragment =  $2 \times (24 \text{ lysine primary amines} + 1 \text{ heavy chain alpha amino primary amine}) = 50$  possible methyl groups (each primary amine can incorporate 2 methyl groups, and the light chain alpha amino primary amine is not present due to the pyroglutamate post-translational modification of the N-terminus of the light chain.) Thus, methylation is very close to complete, with 49/50 possible methyl groups added to the Fab fragment by the procedure. This is similar to what has been reported earlier by others (Walter *et al.*, 2006).
